# Supplementary material for: Exploring local views on strengths and challenges in pre-service education for skilled birth attendants, skilled health professionals, and midwives in Nepal
Source: Research Square preprint supplement (doi:10.21203/rs.3.rs-7643872/v1), 2025-09-26
Supplement: Supplementary file 1 [file eeae9229b49badfabc5f431a.docx]

# Supplementary Information

**Figures**

[Supplementary Figure 1. Data collection tool 2](#_Toc208318877)

[Supplementary Figure 2. Additional quotes from the interviews 24](#_Toc208318878)

**Tables**

[Supplementary Table 1. Healthcare workers providing childbirth care by categories in Nepal 26](#_Toc208318879)

[Supplementary Table 2. Infrastructure and learning resources for pre-service education programs for Bachelor in midwifery at four institutions 28](#_Toc208318880)

[Supplementary Table 3. Involvement and functions of Nepal Medical Council, Nepal Nursing Council, Universities, and Medical Education Commission in pre-service education, licensing, and regulation 30](#_Toc208318881)

[Supplementary Table 4. Curricula assessment scores of five pre-service education programs mapped against 2019 ICM competencies in “care during labor and birth” category 32](#_Toc208318882)

# Supplementary Figure 1. Data collection tool

#### Types of key informants, interview purposes, and corresponding interview guide number in document

| **Key informant** | **Interview purposes** | **Interview guide number** |
| --- | --- | --- |
| Staff working on maternal and newborn health within the Ministry of Health (e.g. Chief Nursing/Midwifery Officer or other MOH staff) | - Role and responsibilities related to pre-service and in-service education of health care providers providing childbirth.  - Role and responsibilities related to implementation of evidence-based guidelines.  - Role and responsibilities related to the HWF planning, distribution and personnel development (e.g., educational opportunities and career advancement). | 1 |
| Education institutions (e.g., head of institution, director) and education regulatory bodies | - Elucidate information about pre-service training:   - Organization and administration - Faculty - Students - Curricula - Resources, facilities and services - Quality improvements/Assessment Strategies - Regulation of education. | 2 |
| National Statistical Office and HMIS (staff responsible for reporting) | - Involvement in measurement and reporting on SDG indicator 3.1.2.  - Involvement in conducting population-based surveys e.g., DHS and MICS surveys. | 2 |
| Professional Organizations and regulatory bodies (e.g., ICM and ICN) | - Role and responsibility related to:   - curriculum development; - regulation/accreditation of pre-service education; - licensing of midwives/nurses; - health workforce development. | 4 |
| Representative from DHS and MICS (population household survey) | - Development of the survey questionnaire, local adaptation, and analysis. | 5 |
| WHO, UNFPA, and UNICEF country offices | - Involvement and roles in relation to education programmes for health care providers, MNH programmes, measurements, and the health workforce. | 6 |

#### Semi-structured interview guides

##### 1. Interview instructions and interview guide

###### This interview guide is specific for staff working on maternal and newborn health within the Ministry of Health (e.g., Chief Nursing/Midwifery Officer or other MoH HMN Staff)

Name of interviewer: ________________________________________

Date: _____________________________________________________

Name of interviewee: ________________________________________

Interviewee affiliation: _______________________________________

**Explain the objectives of the interview**

Explain the objectives of the interview and introduce yourself (project member).

“Good morning/afternoon, I am ____________ (introduce self)”.

“We are working on a project related to measurement of skilled health personnel providing childbirth care according to the new definition which was published in 2018 but a measurement framework has not yet been developed.

The 2018 Definition of skilled health personnel clearly states the competency level expected of a health care provider determined as “skilled health personnel”. The importance of quality pre-service and in-service training, regulation and licensing, an enabling environment, referral systems and teamwork are specified (a copy of the 2018 Definition framework should be shared in the email invitation to take part in this interview).

This interview is being conducted to get your input on aspects related to skilled health personnel providing childbirth care in (Nepal, Senegal and Zambia – delete as appropriate). I am especially interested in:

- Your role and responsibilities related to pre-service and in-service education of health care providers providing childbirth.
- Your role and responsibilities related to the health workforce planning, distribution, and personnel development (e.g., educational opportunities and career advancement).

The information from the interview will help to inform how the concepts of the 2018 Definition can be measured in the context of Nepal/Senegal/Zambia”.

***Consent to take part in the interview***

1. Reading the consent form;
2. Ask if OK to record the conversation for later analysis purposes;
3. Explain data confidentiality and storage of data;
4. Interview duration: approximately one hour; and
5. Individual signature of the Informed Consent Form and verbal agreement to participate.

“If you agree to this interview and the recording please sign the Informed Consent Form”.

**Interview guide**

(questions may vary depending on the progress of the interview).

- I would like to start by having you briefly describe your role and responsibilities in relation to the health care providers providing childbirth care.

(Probe if needed: education, training, supervision, health workforce, technical support)

- Can you tell me about the different pre-service training programmes – by professional titles - which currently are in place to educate health care providers providing childbirth care?

(Probe if needed and please use the table below to fill in the information. Add more rows if needed)

| **Professional title** | **Training programme** | **Duration** | **Entry requirements** | **Registration with the professional body** | **Registration and licensing to**  **maintain practice** |
| --- | --- | --- | --- | --- | --- |
|  |  |  |  |  |  |
|  |  |  |  |  |  |
|  |  |  |  |  |  |
|  |  |  |  |  |  |
|  |  |  |  |  |  |

- Can you tell me if any new pre-service education programmes are planned?
- What kind of in-service training is offered to providers providing childbirth care and is any in-service training compulsory?

(Probe if needed: MOH training at facility level, on-line courses, training provided by NGOs or other organizations)

- Do you have any role and responsibilities related to the health workforce planning? If yes, could you please explain?

(Probe if needed: e.g., recruiting, retention and distribution of health care providers in relation to competencies (titles), urban/rural distribution, ensuring a “fit for purpose” workforce)

- What is being done within MOH to ensure personnel development for childbirth care providers?

(Probe if needed: e.g., educational opportunities and career advancement)

- Is there any other information you would like to share that you think could be useful for me to know about childbirth care providers?

**End of interview**

End the interview with thanking the interviewee and inform the interviewee that she/he will have the opportunity to see the transcription for consideration and validation.

##### 2. Interview instructions and interview guide

###### This interview guide is specific for staff working on maternal and newborn health within the education institutions (nursing, midwifery and medical doctor, or other titles used for these providers)

Name of interviewer: ________________________________________

Date: _____________________________________________________

Name of interviewee: ________________________________________

Interviewee affiliation: _______________________________________

**Explain the objectives of the interview**

Explain the objectives of the interview and introduce yourself (project member).

“Good morning/afternoon, I am ____________ (introduce self)”.

“We are working on a project related to measurement of skilled health personnel providing childbirth care according to the new definition which was published in 2018 but a measurement framework has not yet been developed.

The 2018 Definition of skilled health personnel clearly states the competency level expected of a health care provider determined as “skilled health personnel”. The importance of quality pre-service and in-service training, regulation and licensing, an enabling environment, referral systems and teamwork are specified (a copy of the 2018 Definition framework should be shared in the email invitation to take part in this interview).

This interview is being conducted to get your input on aspects related to skilled health personnel providing childbirth care in (Nepal, Senegal or Zambia– delete as appropriate). I am especially interested in aspects related to:

- Organization and administration
- Faculty
- Students
- Curriculum
- Resources, facilities and services
- Quality improvements/Assessment Strategies/Regulation of education

***Consent to take part in the interview***

1. Reading the consent form;
2. Ask if OK to record the conversation for later analysis purposes;
3. Explain data confidentiality and storage of data;
4. Interview duration: approximately one hour; and
5. Individual signature of the Informed Consent Form and verbal agreement to participate.

“If you agree to this interview and the recording please sign the Informed Consent Form”.

**Interview guide**

(questions may vary depending on the progress of the interview).

- I would like to start by having you briefly describe your role and responsibilities in relation to the pre-service programme for nursing, midwifery and medical doctor in your institution (need to replace with the pertinent professional provider group).

(Probe if needed: responsibility for the quality and organization of the pre-service programme, delegation of roles and responsibilities, faculty development and assessment of faculty performance)

- How would you describe your faculty (nursing, midwifery, medical doctor (need to replace with the pertinent professional provider group) in relation to the teaching capacity with respect to both theory and clinical practise?

(Probe if needed: teacher’s qualification, teachers have formal preparation for teaching, demonstrates competency in clinical practise; the working environment, teacher/student ratio)

- Can you tell me about the student admission policies as well as programme policies?

(Probe if needed: entry requirements, admission process, written student policies)

- Can you tell me how the per-service curriculum is being developed within your institution?

(Probe if needed: are course content both theory and practice elements aligned with national/international standards, pedagogical methods and assessment strategies, curriculum shared with student, curriculum revision and frequency, curriculum content is based on evidence-based guidelines and best practises)

- How would you describe the programme resources at your institution?

(Probe if needed: physical space, equipment (computers, internet, literature) teaching aids, skills laboratories, clinical learning sites during education, fulfil the requirements for post-education registration. Please use the check list below)

Check list for interviewer and ask if one of the items is not mentioned and add as appropriate.

| **Resources** | **Yes/No/Comments** |
| --- | --- |
| Classroom space for all students |  |
| Non-stop electricity |  |
| Computers |  |
| Non-stop Internet |  |
| Library (up to date) |  |
| All students have access to needed learning materials |  |
| Access to teaching aids |  |
| Access to skills labs |  |
| Sufficient clinical learning sites |  |
| Accreditation in place to fulfil post-education registration |  |
|  |  |
|  |  |

- Can you describe assessment strategies used in your institution to assess the programme as part of quality improvement?

(Probe if needed: curriculum, admission policies, student progress, attrition, registration pass rate, adequacy resources)

- Is there any other information you would like to share that you think could be useful for me to know regarding your institution?

**End of interview**

End the interview with thanking the interviewee and inform the interviewee that she/he will have the opportunity to see the transcription for consideration and validation.

##### 3. Interview instructions and interview guide

###### This interview guide is specific for staff working within National Statistical Office and HMIS (staff responsible for SDG reporting and being part of conducting population-based surveys)

Name of interviewer: ________________________________________

Date: _____________________________________________________

Name of interviewee: ________________________________________

Interviewee affiliation: _______________________________________

**Explain the objectives of the interview**

Explain the objectives of the interview and introduce yourself (project member).

“Good morning/afternoon, I am ____________ (introduce self)”.

“We are working on a project related to measurement of skilled health personnel providing childbirth care according to the new definition which was published in 2018 but a measurement framework has not yet been developed.

The 2018 Definition of skilled health personnel clearly states the competency level expected of a health care provider determined as “skilled health personnel”. The importance of quality pre-service and in-service training, regulation and licensing, an enabling environment, referral systems and teamwork are specified (a copy of the 2018 Definition framework should be shared in the email invitation to take part in this interview).

This interview is being conducted to get your input on aspects related to skilled health personnel providing childbirth care in (Nepal, Senegal or Zambia– delete as appropriate). I am especially interested in aspects related to:

- Your role and responsibilities in measurement and reporting on SDG indicator 3.1.2.
- Your role and responsibilities in conducting population-based surveys e.g., DHS and MICS surveys (questionnaire development and analysis).

***Consent to take part in the interview***

1. Reading the consent form;
2. Ask if OK to record the conversation for later analysis purposes;
3. Explain data confidentiality and storage of data;
4. Interview duration: approximately one hour; and
5. Individual signature of the Informed Consent Form and verbal agreement to participate.

“If you agree to this interview and the recording please sign the Informed Consent Form”.

**Interview guide**

(questions may vary depending on the progress of the interview).

- I would like to start by having you briefly describe your role and responsibilities in relation to measurement and reporting on SDG indicator 3.1.2.

(Probe if needed: how do you collect the data, which data sources are included, how do you assess the data quality, how do you assess which providers are “skilled” versus not “skilled”, are you engaging in the UNICEF/WHO country consultation for SDG reporting, computation and analysis)

- Can you describe your function in relation to taken part in conducting population-based surveys? I am particularly interested in the development of the questions and categories related to the question about the health professional(s) that assisted women during childbirth – who decides on which health professional categories should be included (both skilled and unskilled)?
- Can you describe how you coordinate the SDG reporting with the maternal and newborn unit (or another unit) within MoH?
- Can you tell me how the data on skilled health personnel providing childbirth care (SDG indicator 3.1.2) are used for local planning?
- Is there any other information you would like to share that you think could be useful for me to know about regarding measurement and reporting on SDG 3.1.2?

**End of interview**

End the interview with thanking the interviewee and inform the interviewee that she/he will have the opportunity to see the transcription for consideration and validation.

##### 4. Interview instructions and interview guide

###### This interview guide is specific for Professional Organizations and regulatory bodies (e.g., ICM and ICN, organization for medical doctors)

Name of interviewer: ________________________________________

Date: _____________________________________________________

Name of interviewee: ________________________________________

Interviewee affiliation: _______________________________________

**Explain the objectives of the interview**

Explain the objectives of the interview and introduce yourself (project member).

“Good morning/afternoon, I am ____________ (introduce self)”.

“We are working on a project related to measurement of skilled health personnel providing childbirth care according to the new definition which was published in 2018 but a measurement framework has not yet been developed.

The 2018 Definition of skilled health personnel clearly states the competency level expected of a health care provider determined as “skilled health personnel”. The importance of quality pre-service and in-service training, particularly, an enabling environment, referral systems and teamwork are specified (a copy of the 2018 Definition framework should be shared in the email invitation to take part in this interview).

This interview is being conducted to get your input on aspects related to skilled health personnel providing childbirth care in (Nepal, Senegal or Zambia – delete as appropriate). I am especially interested in your role and responsibilities related to:

- curriculum development
- regulation/accreditation of pre-service education
- licensing/relicensing of (need to add pertinent professional title(s) midwives/nurses/medical doctors).

***Consent to take part in the interview***

1. Reading the consent form;
2. Ask if OK to record the conversation for later analysis purposes;
3. Explain data confidentiality and storage of data;
4. Interview duration: approximately one hour; and
5. Individual signature of the Informed Consent Form and verbal agreement to participate.

“If you agree to this interview and the recording please sign the Informed Consent Form”.

**Interview guide**

(questions may vary depending on the progress of the interview).

- I would like to start by having you briefly describe your role and responsibilities in relation the regulation/accreditation of pre-service education for (need to add the pertinent professional title(s)) as well as licensing/relicensing.
- Can you tell me about regulation and legislation to practice (for nurses, midwives, medical doctors, or other professionals need to include pertinent title for the interview) the constitution and composition of the regulatory body and the procedures?

(Probe if needed: no legislation, rules are in place but not functioning (ineffective), authority in place and well-functioning, the constitution and composition of the regulatory body (membership – including elected and appointed membership), their powers, reporting mechanisms and responsibilities).

- Can you tell me about the licensing and relicensing mechanisms and procedures for (for nurses, midwives, medical doctors, or other professionals need to include pertinent title for the interview)?

(Probe if needed: for initial licensing; testing requirements (pass standard), qualification verification, term of the initial license, initial license fees. For relicensing: continued competency assessments requirements, updates for knowledge, assessment of clinical skills, relicense fees).

- Can you tell me about your role and responsibilities in curriculum development for

(for nurses, midwives, medical doctors or other professionals need to include pertinent title for the interview)?

(Probe if needed: content of curriculum, revisions/updates, level of competencies, assessment criteria, pedagogical considerations, implementation)

- Is there any other information you would like to share that you think could be useful for me to know regarding your capacity as the Professional Organization for (add pertinent organization)?

**End of interview**

End the interview with thanking the interviewee and inform the interviewee that she/he will have the opportunity to see the transcription for consideration and validation.

##### 5. Interview instructions and interview guide

###### This interview guide is specific for representative from DHS and MICS (population household survey)

Name of interviewer: ________________________________________

Date: _____________________________________________________

Name of interviewee: ________________________________________

Interviewee affiliation: _______________________________________

Explain the objectives of the interview and introduce yourself (project member).

“Good morning/afternoon, I am ____________ (introduce self)”.

“We are working on a project related to measurement of skilled health personnel providing childbirth care according to the new definition which was published in 2018 but a measurement framework has not yet been developed.

The 2018 Definition of skilled health personnel clearly states the competency level expected of a health care provider determined as “skilled health personnel”. The importance of quality pre-service and in-service training, regulation and licensing, an enabling environment, referral systems and teamwork are specified (a copy of the 2018 Definition framework should be shared in the email invitation to take part in this interview).

This interview is being conducted to get your input on aspects related to skilled health personnel providing childbirth care in (Nepal, Senegal or Zambia– delete as appropriate). I am especially interested in the development of the survey questionnaire and local adaptation for the question related which health professional(s) that assisted women during childbirth (“who assisted with the delivery of (name)?”)

***Consent to take part in the interview***

1. Reading the consent form;
2. Ask if OK to record the conversation for later analysis purposes;
3. Explain data confidentiality and storage of data;
4. Interview duration: approximately one hour; and
5. Individual signature of the Informed Consent Form and verbal agreement to participate

“If you agree to this interview and the recording please sign the Informed Consent Form”.

**Interview guide**

(questions may vary depending on the progress of the interview).

- I would like to start by having you describing your role and responsibilities in relation to DHS/MICS questionnaire development, the local adoption and customization
- What are your experiences in working with countries in customization the questionnaire and the stakeholders involved in this work?
- Is there any other information you would like to share that you think could be useful for me to know regarding the questionnaire development and analysis?

**End of interview**

End the interview with thanking the interviewee and inform the interviewee that she/he will have the opportunity to see the transcription for consideration and validation.

##### 6. Interview instructions and interview guide

###### This interview guide is specific for representative from WHO, UNICEF and UNFPA country offices

Name of interviewer: ________________________________________

Date: _____________________________________________________

Name of interviewee: ________________________________________

Interviewee affiliation: _______________________________________

Explain the objectives of the interview and introduce yourself (project member).

“Good morning/afternoon, I am ____________ (introduce self)”.

“We are working on a project related to measurement of skilled health personnel providing childbirth care according to the new definition which was published in 2018 but a measurement framework has not yet been developed.

The 2018 Definition of skilled health personnel clearly states the competency level expected of a health care provider determined as “skilled health personnel”. The importance of quality pre-service and in-service training, regulation and licensing, an enabling environment, referral systems and teamwork are specified (a copy of the 2018 Definition framework should be shared in the email invitation to take part in this interview).

This interview is being conducted to get your input on aspects related to skilled health personnel providing childbirth care measurement in (Nepal, Senegal or Zambia – delete as appropriate). I am especially interested in your involvement in relation to education of providers providing childbirth care and the MOH maternal and newborn health programmes.

***Consent to take part in the interview***

1. Reading the consent form;
2. Ask if OK to record the conversation for later analysis purposes;
3. Explain data confidentiality and storage of data;
4. Interview duration: approximately one hour; and
5. Individual signature of the Informed Consent Form and verbal agreement to participate.

“If you agree to this interview and the recording please sign the Informed Consent Form”.

**Interview guide**

(questions may vary depending on the progress of the interview).

- I would like to start by having you describing your role and responsibilities in relation to maternal and newborn health programmes and implementation, and especially measurements in relation to SDG 3.1.2.
- Can you tell me about your involvement and roles in relation to pre-service and in-service education programmes for health care providers providing childbirth care and the health workforce providing childcare services?
- Is there any other information you would like to share that you think could be useful for me to know about regarding education/training of providers providing childbirth care maternal and newborn health programmes from the country office perspective?

**End of interview**

End the interview with thanking the interviewee and inform the interviewee that she/he will have the opportunity to see the transcription for consideration and validation.

#### Informed consent form

[INSTITUTIONAL LETTER HEAD]

**Informed Consent Form for**

This informed consent form is for stakeholders, who we are being inviting to participate in the project titled “*Development of a feasible and useful measurement of “skilled health personnel” providing childbirth care according to the 2018 Definition and joint statement: Nepal, Senegal and Zambia as case study examples”.*

**Name of Main project team members:** Ann-Beth Moller and Loveday Penn-Kekana.

**Name of project team member in Nepal: xxx**

**Name of project team member in Senegal: xxx**

**Name of project team member in Zambia: xxx**

**Name of Organizations:** World Health Organization and London School of Hygiene and Tropical Medicine.

**Name of Project:** Development of a feasible and useful measurement of “skilled health personnel” providing childbirth care according to the 2018 Definition and joint statement: Nepal, Senegal and Zambia as case study examples.

**This Informed Consent Form has two parts:**

• **Information Sheet (to share information about the study with you)**

• **Certificate of Consent (for signatures if you choose to participate)**

**You will be given a copy of the full Informed Consent Form**

**Part I: Information Sheet**

**Introduction**

I am, XX, working for the XXXX. I am part of the project team working on the measurement of skilled health personnel providing childbirth care according to the 2018 Definition and joint statement.

I am going to give you information and invite you to be part of this project. Before you decide, you can talk to anyone you feel comfortable with about the project.

This consent form may contain words that you do not understand. Please ask me to stop as we go through the information and I will take time to explain. If you have questions later please don’t hesitate to ask.

**Purpose of the project**

Evidence has suggested that while countries reported relatively high levels of birth attendance by skilled health personnel, maternal and neonatal mortality were not reduced proportionally.

To address these challenges, a Task Force composed of the interagency group including WHO, UNICEF and UNFPA, and the International Confederation of Midwives (ICM), the International Council of Nurses (ICN), the International Federation of Gynecology and Obstetrics (FIGO) and International Pediatric Association (IPA) initiated a process to clarify and refine the definition of the widely used term and indicator “skilled birth attendant” (SBA). The outcome of this work was a revised definition (2018 Definition and statement) of skilled health personnel. A measurement framework is yet to be developed to enable countries to measure and report based on the revised 2018 Definition of this important indicator.

With this project we aspire to operationalize the measurement of the “2018 Definition of skilled health personnel” so that it can be used nationally and globally to improve the current measurement of the SDG 3.1.2 indicator “percentage of births attended by skilled health professional”.

We believe that you can help us by telling us your experiences related to “skilled health professional providing childbirth care” or often called “skilled birth attendants” measurement and other aspects of the concepts included in the 2018 Definition.

**Type of Project Intervention**

This project will involve your participation in a one-hour interview (face-to-face interview or virtual interview).

**Participant Selection**

You are being invited to take part in this project because we feel that your experience as a (insert role of stakeholder) can contribute much to our understanding and knowledge of the skilled health professional providing childbirth care as well as its measurement.

**Voluntary Participation**

Your participation is entirely voluntary. If you decide to participate in the interview, you can withdraw at any moment. You also have the option of refusing to answer any questions. If you stop participating in the interview or do not answer any of the questions, it will not affect you in anyway.

**Procedures**

If you agree to participate in this interview, you will be required to attend a face-to-face or virtual interview on a day of your choice. The interview will last around an hour and will consist of a discussion about your current role and activities related to the measurement of skilled health professional providing childbirth care. The interview will be recorded. The audio recordings are designed to assist the project team members to hear exactly what was said and will only be used for project purposes. Recordings will be transcribed and will have identification codes instead of your name.

If you do not wish to answer any of the questions during the interview, you may say so and the interviewer will move on to the next question. The information recorded is confidential, and only the project team will have access to the files. Your name will not appear on any form, you will be registered with a specific number (code) for each participant. Part of information from this interview may be published, but the publications will not include the names of any participants. The record will be archived and destroyed after five (05) years.

**Duration**

The project takes place over approximately period of one year. During that time, we will interview you and send you the transcription for your consideration and validation.

**Risks**

When participating in the interview, the main risk is the loss of confidentiality, that is, the risk that the information you give us will be improperly disclosed. However, interviewers will be reminded that everything said in the interview will be kept confidential. There is also a risk that you may share some personal or confidential information by chance, or that you may feel uncomfortable talking about some of the topics. Nevertheless, we do not wish for this to happen. You do not have to answer any question or take part in the interview if you feel the question(s) are too personal or if talking about them makes you uncomfortable.

Our project team members have been trained in ethical issues related to conducting interviews.

**Benefits**

There will be no direct benefit to you, but your participation is likely to help us with operationalizing the measurement of the “2018 Definition of skilled health personnel” so that can be used nationally and globally to improve the current measurement of the SDG 3.1.2 indicator “percentage of births attended by skilled health professional”.

**Reimbursements**

You will not be provided any incentive to take part in the interview.

**Confidentiality**

All interview information will be kept private. We will take every precaution to safeguard your privacy. All information will be saved on a secured server, including your name and other personally identifying information. The files will only be accessible to the project team. Your name will not appear on any form, you will be registered with a specific number (code) for each participant. Information from this interview may be published, but the publications will not include the names.

**Sharing the Results**

Nothing that you tell us today will be shared with anybody outside the project team, and nothing will be attributed to you by name. The knowledge that we get from this project will be shared with you before it is made widely available to the public. Each participant will receive a summary of the results.

**Right to Refuse or Withdraw**

You do not have to take part in this project if you do not wish to do so and choosing to participate will not affect you in any way. You may stop participating in the interview at any time that you wish without affecting you in any way.

**Who to Contact?**

If you have any questions, you can ask them now or later. If you wish to ask questions later, you may contact any of the following:

- Ann-Beth Moller: [mollera@who.int](mailto:mollera@who.int)
- Loveday Penn-Kekana: [loveday.penn-kekana@lshtm.ac.uk](mailto:loveday.penn-kekana@lshtm.ac.uk)
- *Add name of local consultant*

**This proposal has been reviewed and approved by [name of the local IRB], which is a committee whose task it is to make sure that research participants are protected from harm. If you wish to find about more about the IRB, contact [name, address, telephone number.]). It has also been reviewed by the Global Health Ethics of the World Health Organization (WHO).**

**Part II: Certificate of Consent**

**I have been invited to participate in the project about the “**Development of a feasible and useful measurement of “skilled health personnel” providing childbirth care according to the 2018 Definition and joint statement: Nepal, Senegal and Zambia as case study examples”.

**I have read the foregoing information, or it has been read to me. I have had the opportunity to ask questions about it and any questions I have been asked have been answered to my satisfaction. I consent voluntarily to be a participant in this study**

**Print Name of Participant__________________**

**Signature of Participant ___________________**

**Date ___________________________**

Day/month/year

**Statement by the project team member/person taking consent**

**I have accurately read out the information sheet to the potential participant, and to the best of my ability made sure that the participant understands that the following will be done:**

**1. The interview will be recorded**

**2. Recordings will be transcribed**

**3. Transcription will be sent to the interviewee for validation**

**I confirm that the participant was given an opportunity to ask questions about the study, and all the questions asked by the participant have been answered correctly and to the best of my ability. I confirm that the individual has not been coerced into giving consent, and the consent has been given freely and voluntarily.**

**A copy of this ICF has been provided to the participant.**

**Print Name of** **project team member/person taking the consent________________________**

**Signature of project team member/person taking the consent__________________________**

**Date ___________________________**

Day/month/year

# Supplementary Figure 2. Additional quotes from the interviews

**Educational Institutions: Strengths**

Instructor qualification, training, and job attributes:

- *“Nursing educators for B. Mid must have a Master’s Degree in Midwifery Nursing or Women’s Health and Development or M. Sc. Nursing in Obstetrics and Gynecology. They also must have specialization registration with the Nepal Nursing Council”.*
- For medical doctor pre-service programs, MDGP and MD Obstetrics and Gynecology educators or tutors must have MDGP/ MD Obstetrics and Gynecology certificates from recognized universities and specialist registration from Nepal Medical Council’s (NMC).
- *“Educators need to upgrade their skills and knowledge continuously. It is desirable to have SBA training, 1 week of Teachers Training (TOT), CMEs/ CNEs and various other faculty development trainings and research trainings as well”*.

Integration of academic and clinical roles:

- As one respondent mentioned, *"nursing educators are posted to various wards as nurse managers and perform clinical duties"*

Nurse-midwife birthing centers:

- In the case of resistance from doctors in allowing nurses to work independently, management has navigated the process of improving collaborative processes between different cadres.
- One stakeholder also shared that these clinics enabled doctors to focus on high-risk cases and research: *“As our Nurses-led ANC Clinic and Birthing Center is functioning independently, we are able to focus on high-risk and complicated cases, as well as focus on gynecology and conduct research in the field of Obs/Gyn”.*

**Government bodies: Challenges**

Lack of career opportunities for midwifery-specific roles:

- Similarly, another respondent expressed the need for government intervention to support increased admission in midwifery programs: “*Thus I would request you through this interview to recommend the government for providing support to increase admission in B-Mid.”*
- Another key informant perceived that there was a *“lack of government policy for job recruitment, deployment and consumption of B-Mid graduates.”*

Delays in SHP training implementation:

- In terms of the current scale of SBA training, another respondent shared: “*Currently there are 30 SBA training sites and 5 Advanced SBA training sites producing SBAs all over the country.”*

**International organizations and external development partners: Strengths**

Strong international collaboration:

- One informant noted, *“We provide financial aid, help to formulate guidelines and modules on SHP/SBA. Furthermore, technical support is provided for other programs such as Safe Motherhood and Newborn Health Road Map: Every Newborn Action Plan”*.
- Another interviewee shared: *“Support is being provided for comprehensive emergency obstetric and neonatal care (CEONC) management in 76 out of 77 districts”*, ensuring that most regions have the capacity to handle emergency situations.

**International organizations and external development partners: Challenges**

Varying understanding of SBAs and SHP between organizations:

- One stakeholder shared: *“Progressive changes must be made- ANMs must be replaced by staff nurses (PCL/ diploma) and staff nurses by midwives.”* Another respondent shared: *“As country’s present need is SBA, at some point Nepal needs to produce and strengthen SHP. Thus, our main role is advocacy for midwifery education, deployment and placement of midwives as per their qualification.”*
- Another stakeholder shared: *“We support National Health Training Center for development and finalization of SHP/ SBA modules (6 modules) and piloting test of it.”*

**Professional organizations: Strengths**

Active professional organization for midwifery:

- Nepal’s dedicated midwifery professional organization focuses on capacity building of midwifery, quality monitoring of midwifery education, and advocacy for the profession.
- “*We focus on capacity building of frontline service providers who are posted at low Human Development Index districts. We provide training package for grass root level healthcare providers such as Helping Babies Breathe and Helping Mothers survive etc. Our focus is also on leadership training for students. Similarly, we provide Midwifery Educators training for teachers. We also monitor the quality of midwifery education and services.”*

**Professional organizations: Challenges**

Midwifery graduates are not matched to appropriate roles:

- Respondents shared some challenges with deployment of midwives: “ *Organization and management survey has been done, the report and recommendation has been submitted to MOHP. However, government has not created any new posts for midwifes, so placement of midwife graduates is not as per qualification. They are working in general hospitals, trauma centers etc. which indirectly impacts on students’ interest in pursuing midwifery as a career option”.*
- Interviewees also suggested alternative pathways to midwifery to build the cadre as a whole: *“Discussion regarding bridge course in midwifery for upgrading existing maternity ward nurses to midwives through in-service training is also being considered as it has been realized that only with PCL midwifery it is not possible to meet the demand for midwifery”.*

# Supplementary Table 1. Healthcare workers providing childbirth care by categories in Nepal

Registered auxiliary nurse midwives (ANMs) are considered SBA but not SHP, whereas nurses (Proficiency Certificate Level and above), midwives, and doctors (MBBS and above) engaged in maternal and newborn care are considered SBA and SHP.

| **Healthcare workers currently providing childbirth care in Nepala** | **Health care worker categories in the Nepal DHS classed as SBAb** | **Definition of SBA, Nepal Policy 2006**c | **Definition of SHP, Nepal Policy 2021**d |
| --- | --- | --- | --- |
|  | Health Assistant / Auxiliary Health Worker (AHW) |  |  |
| Auxillary Nurse Midwife (ANM) | Auxillary Nurse Midwife (ANM ) | ANM who has successfully completed Module 1-3 of SHP/SBA training provided by National Health Training Center (NHTC) |  |
| Staff Nurse Proficiency Certificate Level (PCL) | Staff Nurse (Proficiency Certificate Level and above) | Staff Nurse (PCL and above) | Staff Nurse (PCL and above)  Have successfully completed Module 1-4 of the SHP/SBA in-service training provided by NHTC |
| Midwife | Midwife | Midwife | Midwife |
| Doctors   - MBBS - MDGP - Obstetricians - Pediatricians | Doctors   - MBBS - MDGP - Obstetricians - Pediatricians | Doctors   - MBBS - MDGP - Obstetricians - Pediatricians | Doctors   - MBBS who becomes an advanced SBA through successfully completing Module 1-5 of the SHP/SBA in-service training provided by NHTC |

a. Note: Program training lengths are 1.5 years for Auxiliary Nurse-Midwife, 3 years for PCL Nursing, 3 years for Bachelor of Nursing, 3 years for PCL Midwifery, 4 years for Bachelor of Midwifery, 3 years for MD General Practice and Emergency Medicine, 3 years for MD Obstetrics and Gynaecology, 5 years plus 1-year compulsory internships for Bachelor of Medicine Bachelor of Surgery.

b. Ministry of Health Population & ICF. Nepal Demographic and Health Survey 2022. (Ministry of Health and Population [Nepal], Kathmandu, Nepal, 2023).

c. Nepal Ministry of Health and Population. National Policy on Skilled Birth Attendants. Supplementary to Safe Motherhood Policy 1998. (Department of Health Services Family Health Division, Kathmandu 2006).

d. Nepal Ministry of Health and Population. Strategy for Skilled Health Personnel and Skilled Birth Attendants 2020-2025. (Department of Health Services Family Welfare Division Kathmandu, 2021).

# Supplementary Table 2. Infrastructure and learning resources for pre-service education programs for Bachelor in midwifery at four institutions

| **Infrastructure and learning resources** | **Lalitpur Nursing campus** | **Paropakar Maternity Hospital** | **Institute of Medicine (IOM), Nursing campus Maharajganj** | **Kathmandu University School of Medical Sciences** |
| --- | --- | --- | --- | --- |
| **Classroom space for all students** | Spacious 40 student per class | Spacious (40 students /class) | Adequate | Yes, sufficient |
| **Non- Stop Electricity** | Yes | Yes | Yes | Yes/backup system |
| **Computers** | 14 computers, however students use their personal laptop | 14 computers functioning | Yes, many students have their own laptops, so its use is decreasing | Yes, including laptops functioning well |
| **Non-stop internet** | Yes | Yes | Yes | Yes, with free Wi-Fi |
| **Library (up to date)** | E-library - yes, Midwifery book at present enough  Website use | No E-library, but have access to textbooks and websites midwifery evidence-based website | No E-library | E-library - yes  Library up to date, Basic science library yearly update |
| **All students have access to needed learning materials** | Yes | Yes | Yes | Yes |
| **Access to teaching aids** | Yes | yes | Yes | Yes |
| **Access to skill labs** | Fully functioning skill lab | Fully functioning skills lab | Yes | Yes, need to book first with skill clinical instructor /in charge or lecturer presence, (open 9:00 am-4:00 pm) |
| **Sufficient clinical learning sites** | Enough clinical learning sites | Enough, with maternity hospital case load | Yes | Yes, 1-month residential field Melmachi, home delivery & PHC delivery, conduct micro project with staff and internship |
| **Accreditation in place to fulfill post-education registration** | Accreditation is provided to those who pass Nepal Nursing Council (NNC) examination.  For midwifery, requires50% in theory and 80% in practical exam to be secured to be considered pass. | Accreditation is provided to those who pass NNC examination (Licensing exam requires 50% on theory component and 80% on practical component to pass) | IOM (Institute of Medicine) provides certificate | Accreditation is provided to those who pass NNC examination |
| **Curriculum and assessment** | All concerned faculty are involved | Revision is done in every 3 to 5 years | Plan is to revise every 5 years | Revision every 5 years |
| **Admission Policies** | As per MEC (Medical Education Commission) criteria | No information available. As per MEC criteria | As per NMC and MEC rule criteria | Not shared |
| **Student progress and attrition** | No drop out | No drop out | Good, no attrition | 99% pass, Counselling to students - psychosocial counselling, social service all department. One student left (BMS low admission due to no job after completion, currently only 2 students with scholarship) |
| **Adequacy Resources** | Yes | Yes | Yes | Adequate resources |

# Supplementary Table 3. Involvement and functions of Nepal Medical Council, Nepal Nursing Council, Universities, and Medical Education Commission in pre-service education, licensing, and regulation

|  | **Nepal Medical Council (NMC)** | **Nepal Nursing Council (NNC)** | **Universities** | **Medical Education Commission (MEC)** |
| --- | --- | --- | --- | --- |
| **Mapping of health institutions based on population for fair and equitable distribution, as per need of provinces** |  |  |  | Responsible |
| **Standards for accreditation of pre-service education** |  |  |  | Comprehensive Standards & Guidelines for accreditation of institutions for MBBS, MD (Obs/gyn), MD GP, Nursing, Midwifery. Includes:  Infrastructure, faculty qualification, curriculum etc. |
| **Determination of reservation/ quotas based on ACT and national priorities.** |  |  |  | 75% of all seats in govt institutions (graduate) and 100% (post- graduate) are free; of this 45% if reserved & 55% is open.  Priority to applicants from community schools (grades 6-10).  Teacher student ratio- 1:10-1: 14; |
| **Allocation of students to all medical nursing and midwifery institutes** |  |  |  | Entry criteria as per MEC ACT and common entrance exam |
| **Accreditation of medical &nursing/ midwifery institutions** |  |  |  | Responsible for ensuring that standards laid down by MEC for accreditation of medical, nursing midwifery institutions are met. |
| **Curriculum development** |  |  | On the basis of the core curriculum universities can develop their own curriculum. | MEC is responsible for developing the core curriculum. |
| **Conduct of accreditation exam for medical &nursing/ midwifery courses** |  |  | Universities- give degree certificate |  |
| **Licensing and registration** | Conducts the Licensing exam for registration of medical graduates (MBBS). Relicensing in 5 years | Conducts the Licensing exam for registration of nursing / midwifery graduates |  |  |
| **Continuing professional development (CPD)** | All medical practitioners need to register with NMC to participate in CPD. | All nursing/ midwifery practitioners need to register with NNC to participate in CPD. |  |  |
| **Regulation and legislation to practice** | Gives recognition, according to MEC standards | Gives recognition, according to MEC standards |  |  |
| **Code of conduct** | For doctors prepared by NMC. Remove a medical practitioner from the Registration book, if code of conduct has been breached. | For nurses/ midwives prepared by NNC. Remove a practitioner from the Registration book, if code of conduct has been breached. |  |  |

# Supplementary Table 4. Curricula assessment scores of five pre-service education programs mapped against 2019 ICM competencies in “care during labor and birth” category

| **Section of Category 3 ICM competencies** | **Competency level** | **Indicator (short format)** | **Bachelor in Nursing Science** | **Proficiency Certificate Level in Nursing** | **MD Obstetrics/**  **Gynaecology** | **Proficiency Certificate Level in Midwifery** | **Bachelor of Midwifery** |
| --- | --- | --- | --- | --- | --- | --- | --- |
| 3a: Promote labor | Knowledge | Fetal presentation anatomy/mechanisms | 1 | 1 | 1 | 1 | 1 |
| Cultural beliefs/traditions | 1 | 1 | 1 | 1 | 1 |
| IPC guidelines | 1 | 1 | 1 | 1 | 1 |
| Methods of fetal assessment | 1 | 1 | 1 | 1 | 1 |
| Physiologic progression of labor | 1 | 1 | 1 | 1 | 1 |
| Signs of labor progress | 1 | 1 | 1 | 1 | 1 |
| Skills and behaviours | Assess maternal-fetal status | 1 | 1 | 1 | 1 | 1 |
| Assess physical responses to labor | 1 | 1 | 1 | 1 | 0 |
| Augment uterine contractility | 1 | 1 | 1 | 1 | 1 |
| Encourage movement/ positions | 0 | 1 | 0 | 1 | 1 |
| Obtain obstetric/ medical history | 1 | 1 | 1 | 1 | 0 |
| Support with pain | 0 | 1 | 1 | 1 | 1 |
| Order/interpret laboratory tests | 1 | 1 | 1 | 1 | 1 |
| Perform / interpret physical examination | 1 | 1 | 1 | 1 | 1 |
| Prevent unnecessary intervention | 0 | 0 | 0 | 0 | 0 |
| Allow birth setting preference | 0 | 0 | 1 | 1 | 0 |
| Inform/support/ encourage mother | 1 | 1 | 1 | 1 | 0 |
| Provide nourishment/ fluids | 0 | 1 | 0 | 1 | 0 |
| Provide respectful care | 1 | 1 | 0 | 0 | 0 |
| Use graphic display | 1 | 1 | 1 | 1 | 1 |
| 3b: Manage birth | Knowledge | Evidence about third stage | 1 | 1 | 1 | 1 | 1 |
| Manage spontaneous vaginal birth | 1 | 1 | 1 | 1 | 1 |
| Management of emergencies | 1 | 1 | 1 | 1 | 1 |
| Potential complications / treatment | 1 | 1 | 1 | 1 | 1 |
| Signs of placental separation | 1 | 1 | 1 | 1 | 1 |
| Types of trauma requiring repair | 0 | 0 | 1 | 1 | 0 |
| Skills and behaviours | Assess newborn condition | 1 | 1 | 1 | 1 | 1 |
| Assess uterine tone / blood loss | 1 | 1 | 1 | 1 | 1 |
| Coach pushing | 0 | 0 | 0 | 1 | 0 |
| Delay cord clamping | 0 | 0 | 0 | 0 | 1 |
| Deliver / inspect placenta | 1 | 1 | 0 | 1 | 0 |
| Ensure clean / ready environment | 1 | 1 | 0 | 1 | 1 |
| Expedite birth if fetal distress | 1 | 0 | 1 | 1 | 0 |
| Inspect for trauma / repair | 0 | 1 | 1 | 1 | 1 |
| Manage nuchal cord | 0 | 1 | 1 | 1 | 0 |
| Provide first measures for conditions | 1 | 1 | 1 | 1 | 1 |
| Provide skin to skin / warmth | 1 | 1 | 0 | 1 | 1 |
| Refer to continuing treatment | 1 | 1 | 1 | 1 | 1 |
| Support position of choice | 0 | 1 | 0 | 1 | 1 |
| Undertake position manoeuvers | 1 | 1 | 1 | 0 | 0 |
| 3c: Newborn care | Knowledge | Appearance of healthy newborn | 1 | 1 | 0 | 1 | 1 |
| Breathing / circulation interventions | 1 | 1 | 1 | 1 | 1 |
| Assessing newborn gestational age | 0 | 1 | 0 | 1 | 1 |
| Needs of small newborns | 0 | 1 | 1 | 1 | 1 |
| Normal transition | 1 | 1 | 1 | 0 | 1 |
| Newborn scoring systems | 0 | 1 | 0 | 1 | 0 |
| Signs indicating immediate action | 1 | 0 | 1 | 1 | 1 |
| Skills and behaviour | Conduct newborn examination | 0 | 0 | 0 | 1 | 1 |
| Establish and support breathing | 1 | 1 | 1 | 1 | 1 |
| Institute newborn prophylaxis | 0 | 1 | 0 | 1 | 1 |
| Involve partner / support persons | 0 | 0 | 0 | 0 | 0 |
| Promote maternal care | 0 | 1 | 0 | 1 | 1 |
| Support initiating breastfeeding | 1 | 1 | 1 | 1 | 1 |
| Use standardized newborn assessment | 0 | 1 | 0 | 1 | 0 |
|  |  | **Total of indicators** | 35 | 45 | 36 | 48 | 38 |
|  |  | **Coverage of indicators (%)** | 65% | 83% | 67% | 89% | 70% |
